# Supplementary material
Source: HighWire-hosted journal article supplement (https://www.cmajopen.ca/highwire/filestream/80820/field_highwire_adjunct_files/1/open-2014-0017-original-submission.pdf)
Supplement: open-2014-0017-original-submission.pdf [file open-2014-0017-original-submission.pdf]

1  
2  
3  
4  
5 **The effects of HIV-1 subtype and ethnicity on CD4 decline in antiretroviral naïve patients:**  
6  
7 **a Canadian-European collaborative cohort study**  
8  
9

10  
11 **Manuscript Type:** Cohort (Retrospective)  
12  
13

14  
15  
16 Marina B. KLEIN MD MSc<sup>1\*</sup>, Jim YOUNG PhD<sup>1,2</sup>, David DUNN PhD<sup>3</sup>, Bruno  
17  
18 LEDERGERBER PhD<sup>4</sup>, Caroline SABIN PhD<sup>5</sup>, Alessandro COZZI-LEPRI PhD<sup>5</sup>, Francois  
19  
20 DABIS MD PhD<sup>6</sup>, Richard HARRIGAN MD<sup>7</sup>, Darryl H Tan MD PhD<sup>8</sup>, Sharon WALMSLEY  
21  
22 MD MSc<sup>9</sup>, John GILL MB MSc<sup>10</sup>, Curtis COOPER MD MSc<sup>11</sup>, Alexandra U. SCHERRER  
23  
24 PhD<sup>4</sup>, Amanda MOCROFT MSc<sup>5</sup>, Robert S. HOGG PhD<sup>7,12</sup>, Fiona SMAILL MB MSc<sup>13</sup> for the  
25  
26 Canadian-European Clade Collaboration  
27  
28  
29  
30

31  
32 <sup>1</sup> Department of Medicine, Division of Infectious Diseases/Chronic Viral Illness Service, Royal  
33 Victoria Hospital, McGill University Health Centre, Montreal, Canada

34  
35 <sup>2</sup> Basel Institute for Clinical Epidemiology and Biostatistics, University Hospital Basel, Basel,  
36 Switzerland

37  
38 <sup>3</sup> Medical Research Council Clinical Trials Unit, London, United Kingdom

39  
40 <sup>4</sup> Division of Infectious Diseases and Hospital Epidemiology, University Hospital Zurich,  
41 University of Zurich, Switzerland

42  
43 <sup>5</sup> Research Department of Infection and Population Health, University College London,  
44 London, United Kingdom

45  
46 <sup>6</sup> Université Bordeaux, ISPED, Centre INSERM U897- Epidémiologie-Biostatistique, F-33000  
47 Bordeaux, France

48  
49 <sup>7</sup> Faculty of Health Sciences, Simon Fraser University, Vancouver, British Columbia, Canada

50  
51 <sup>8</sup> St Michael's Hospital, Division of Infectious Diseases, Toronto, Ontario, Canada

52  
53 <sup>9</sup> University Health Network, University of Toronto, Toronto, Ontario, Canada

54  
55 <sup>10</sup> Southern Alberta HIV Clinic, Calgary, Alberta, Canada  
56  
57  
58  
59  
60

1  
2  
3  
4  
5  
6  
7  
8  
9  
10  
11  
12  
13  
14  
15  
16  
17  
18  
19  
20  
21  
22  
23  
24  
25  
26  
27  
28  
29  
30  
31  
32  
33  
34  
35  
36  
37  
38  
39  
40  
41  
42  
43  
44  
45  
46  
47  
48  
49  
50  
51  
52  
53  
54  
55  
56  
57  
58  
59  
60

<sup>11</sup> The Ottawa Hospital – General Campus, Ottawa, Ontario, Canada

<sup>12</sup> Department of Medicine, Faculty of Medicine, University of British Columbia, Vancouver,  
Canada

<sup>13</sup> Department of Medicine, McMaster University, Hamilton, Ontario, Canada

\* Correspondence and reprint requests to:

Dr. Marina B. Klein,

Department of Medicine, Division of Infectious Diseases and Chronic Viral Illness Service

McGill University Health Centre

Montreal Chest Institute, 3650 Saint Urbain

Montreal, Quebec

H2X 2P4

Canada

Email: [marina.klein@mcgill.ca](mailto:marina.klein@mcgill.ca)

Alternate author contact: Jim Young

Basel Institute for Clinical Epidemiology and Biostatistics

University Hospital Basel

CH-4031 Basel, Switzerland

Tel: +41 61 265 3100

Fax: +41 61 265 3109

Email: [james.young@usb.ch](mailto:james.young@usb.ch)

**Word count:** text 2915; Abstract: 249

## Financial disclosure

This work was supported by Fonds de recherche du Québec, santé (FRQS)--Réseau SIDA/maladies infectieuses (<http://reseau sida.com/default.htm>) for the Montreal Chest Immunodeficiency cohort and MB Klein is supported by a “Chercheur- nationaux” career award from FRQS. The Swiss HIV Cohort Study is supported by the Swiss National Science Foundation [33CS30\_134277] The UK CHIC Study and UK HDRD are funded by a programme grant from the Medical Research Council UK [G06000337] – the views expressed in this manuscript are those of the researchers and not necessarily those of the Medical Research Council. Primary support for EuroSIDA is provided by the European Commission BIOMED 1 [CT94-1637], BIOMED 2 [CT97-2713], and the 5th Framework [QLK2-2000-00773], the 6th Framework [LSHP-CT-2006-018632], and the 7th Framework [FP7/2007-2013, EuroCoord n° 260694] programmes. Current support also includes unrestricted grants by Gilead, Pfizer, and Merck and Co. The ANRS CO3 Aquitaine Cohort is funded in part by the French Agence Nationale de Recherches sur le Sida et les hépatites virales (ANRS), together with the French Institut National de la Santé et de la Recherche Médicale (Inserm) and the Centre Hospitalier Universitaire de Bordeaux (COREVIH Aquitaine and CIC-EC 7). The funders had no role in study design, data collection and analysis, decision to publish, or preparation of the manuscript.

## Competing interests

None of the authors has any financial or personal relationships with people or organisations that could inappropriately influence this work, although most members of the group have received funding from various pharmaceutical companies for research, travel grants, speaking engagements, or consultancy fees.

**Abstract**

**Objectives:** We compared CD4 decline in the most prevalent HIV-1 subtypes during chronic infection focusing on distinguishing between effects of viral subtype and ethnicity.

**Methods:** We merged data from four European and six Canadian cohorts selecting adults in the stable chronic phase of untreated HIV infection. We estimated the change in square root CD4 cell count over time for subtypes and ethnicities using mixed models adjusting for covariates selected because of their potential effect on initial CD4 cell count or its decline.

**Results:** Data from 9,772 patients were analysed, contributing 79,175 CD4 measurements and 24,157 person-years of follow-up. Overall, there were no appreciable differences in CD4 decline relative to subtype B for subtypes A, CRF01\_AE, CRF02\_AG, C or G; whereas CD4 decline in patients of black ethnicity was considerably slower than in patients of other ethnicities. When ethnic groups were studied separately, there was evidence for slower CD4 decline in subtypes C, and possibly A and G, relative to B in patients of black ethnicity but not among those of other ethnicities suggesting an interaction between subtype and ethnicity. Only subtype CRF01\_AG appeared to have a similar effect in both ethnic groups.

**Interpretation:** Ethnicity is a major determinant of CD4 decline; subtype differences may also exist but were small relative to the effect of ethnicity and were most apparent in patients of black ethnicity. In developing countries, slower CD4 decline among individuals of African descent may translate to a longer asymptomatic phase and increase the opportunity for HIV transmission.

**Keywords:** HIV infection, subtypes, Ethnicity, CD4 cell count, Immunologic Progression, cohort

## Introduction

HIV-1 has acquired extensive genetic diversity with nine recognized subtypes (A-D, F-H, J, K) and many circulating recombinant forms (CRFs).<sup>1,2</sup> Subtype B is most widely studied being the predominant virus in North America and Europe. The majority (89%) of HIV infections worldwide, however, are of “non-subtype B” virus with subtypes C, A, and recombinants CRF01\_AE and CRF02\_AG accounting for 73% of all HIV-1 infections.<sup>3</sup> Due to patterns of immigration, a growing number of HIV infections in developed countries are among migrant ethnic communities infected with non-B subtypes,<sup>4,5</sup> with increasing transmission of subtypes between ethnicities.<sup>6</sup> In Canada, non-B subtypes now account for about 15% of newly reported HIV infections.<sup>7</sup>

CD4 cell counts are both the primary prognostic marker for HIV-related disease and the main indicator for the initiation of antiretroviral treatment (ART). As ART is expanded worldwide, it is important to understand whether differences in immunologic progression exist that might necessitate subtype-specific monitoring and treatment guidelines. Subtype specific estimates of CD4 cell count trajectories are also essential for public health models used to predict the course of the HIV epidemic and are helpful for estimating what proportion of persons born abroad acquire HIV infection in their adopted country.<sup>8</sup>

HIV-1 viral diversity might affect immunologic progression through differential interactions with the human host.<sup>9-13</sup> Determining subtype specific effects on immunologic progression is challenging:<sup>14</sup> non-B subtypes predominantly affect individuals of African descent and several studies have suggested that rates of CD4 decline differ according to ethnicity. Ethnic differences

1  
2  
3  
4 have the potential to confound any association between viral subtype and immunologic  
5  
6 progression.<sup>15-17</sup> We conducted a Canadian and European collaborative study to examine CD4  
7  
8 cell decline in untreated patients during the stable chronic phase of HIV infection according to  
9  
10 the most prevalent viral subtypes and focused on distinguishing between the effects of viral  
11  
12 subtype and ethnicity.  
13  
14  
15  
16  
17  
18  
19  
20  
21  
22  
23  
24  
25  
26  
27  
28  
29  
30  
31  
32  
33  
34  
35  
36  
37  
38  
39  
40  
41  
42  
43  
44  
45  
46  
47  
48  
49  
50  
51  
52  
53  
54  
55  
56  
57  
58  
59  
60

Confidential

## Methods

### Data collection

Ten cohorts, or cohort collaborations, contributed to this study; four from Europe and six from Canada (Table 1). This project was approved by the relevant Scientific Boards or Steering Committees. EuroSIDA omitted patients also enrolled in other contributing cohorts. For each patient, we requested all available CD4 cell counts from cohort enrolment until the date of ART initiation and the dates of any newly acquired AIDS defining illness or death.

Seven cohorts provided information on ethnicity using a variety of classifications (Table 1); hence ethnicity was coded as black (e.g. of African descent), other, or unknown. Two Canadian cohorts provided information on country of origin; we assumed black ethnicity for patients from African or Caribbean countries. The ANRS CO3 Aquitaine cohort cannot by French law collect information on ethnicity or country of origin. Viral subtype was determined via the REGA HIV 1&2 Automated Subtyping Tool (version 2.0) based on HIV-1 pol sequences during genotypic resistance testing or, in some earlier cases, with the Subtype Analyzer tool.<sup>18</sup>

Our analysis was restricted to adults (age  $\geq 16$  years) enrolled between January 1998 and June 2010 with known subtype and with at least two CD4 measurements within one year while ART naïve. We selected patients and CD4 measurements within a stable chronic phase of untreated HIV infection. We omitted any patient with a first AIDS event either before or within three months after their first CD4 measurement – such patients were likely to be late presenters. In each patient's series of CD4 measurements, we removed early measurements if within six months of seroconversion (known for only 16%). We removed measurements both at the beginning of the series if below 100 cells per  $\mu\text{l}$  and at the end of the series starting with the first

1  
2  
3  
4 of any two consecutive measurements below 100 cells per  $\mu\text{l}$  – such CD4 cell counts may reflect  
5  
6 advanced infection. We also removed measurements until consecutive measurements both at the  
7  
8 beginning and end of the series were at least 2 and no more than 12 months apart to avoid re-  
9  
10 measurement or measurement prompted by clinical deterioration.  
11  
12  
13

### 14 **Statistical analysis**

15  
16  
17 Patients were followed from the time of the first CD4 measurement in their series until they  
18  
19 started ART, the last CD4 measurement in their series, or death. In the main analysis, we  
20  
21 compared CD4 cell count (square root transformed to stabilise the variance) over time for the  
22  
23 most common HIV-1 subtypes (at least 100 patients available: A, CRF01\_AE, CRF02\_AG, B,  
24  
25 C, or G) using a mixed linear regression model. This mixed model included both patient-specific  
26  
27 random intercepts and random slopes over time to allow for heterogeneity in patients' initial  
28  
29 CD4 cell count and its decline. In the main analysis, models were adjusted for covariates selected  
30  
31 because of their potential effect on initial CD4 cell count (age, sex, ethnicity, initial HIV RNA,  
32  
33 IDU and cohort) or on its decline (age, sex, ethnicity, initial HIV RNA, IDU). In a descriptive  
34  
35 analysis of ethnic and subtype effects, we plotted random effects representing each patient's  
36  
37 estimated CD4 decline from a mixed model without ethnicity or subtype slope parameters. We  
38  
39 also report CD4 intercept and slope estimates for each subtype from mixed models fit to  
40  
41 untransformed data, because rates of CD4 decline are easier to interpret on the original scale than  
42  
43 on a square-root scale.  
44  
45  
46  
47  
48  
49

50  
51 We explored the results from our main analysis in a variety of sensitivity analyses. First,  
52  
53 the main analysis model was re-fit to all CD4 cell counts since January 1998 without further  
54  
55 selection (so as to include measurements made in both the acute and advanced stages of  
56  
57  
58  
59  
60



1  
2  
3  
4 infection). Second, separate mixed models were fit for patients of black and other ethnicities.

5  
6  
7 Third, the main analysis model was fit as part of a joint model, together with an exponential  
8  
9 model for the time to ART initiation.<sup>19</sup> This joint model allows for informative censoring if CD4  
10  
11 cell count series are shorter for some subtypes because patients with these subtypes start therapy  
12  
13 at higher CD4 cell counts. Finally, we varied the covariates and cohorts in the analysis because  
14  
15 not all cohorts were able to provide all covariates of interest.  
16  
17  
18

19  
20 Clinical events such as time to a first AIDS defining illness and death prior to ART  
21  
22 initiation were summarised according to viral subtype and ethnicity. No formal analyses were  
23  
24 conducted because of the small numbers of events and the potential for bias due to unobserved  
25  
26 events prior to cohort enrolment.  
27  
28  
29

30 We used SAS 9.2 (SAS Institute, Cary, NC, USA) for all analyses.  
31  
32  
33  
34  
35  
36  
37  
38  
39  
40  
41  
42  
43  
44  
45  
46  
47  
48  
49  
50  
51  
52  
53  
54  
55  
56  
57  
58  
59  
60

## Results

A total of 14,590 patients met inclusion criteria: 13,682 had one of the subtypes A, CRF01\_AE, CRF02\_AG, B, C, or G. After applying CD4 selection criteria, 9,772 patients remained contributing 79,175 CD4 measurements and 24,157 person-years of follow-up with a median of 6 CD4 measurements per patient (IQR 3, 11). For most patients, CD4 measurements were censored either by ART initiation (37%) or by irregular measurement at the end of the series (33%) but 144 patients (1.5%) reached a CD4 cell count below 100 without starting ART, and 22 patients (0.2%) died.

Subtype B accounted for the majority of infections (81%, Table 2) followed by subtype C (8%), A (4%), CRF02\_AG (4%), CRF01\_AE (2%), and G (1%). The demographic and clinical characteristics of the non-B subtypes were similar, with the exception of CRF01\_AE. Of note, subtypes B and CRF01\_AE had a very low percentage of patients of black ethnicity whereas other subtypes were more ethnically diverse. Initial CD4 cell counts were higher among patients infected with subtypes CRF01\_AE and B, and initial HIV RNA was higher in subtypes A and B.

For the main analysis, we omitted 1162 patients because either their ethnicity or initial HIV RNA was unknown. Note that patients of unknown ethnicity had characteristics similar to those of other ethnicities (Table 3). In the main analysis, patients of black ethnicity had an appreciably slower rate of CD4 decline relative to patients of other ethnicities (Table 4). Differences between subtypes, however, were minor relative to the difference between the two ethnic categories. Subtype differences became apparent when the main analysis model was fit to unselected CD4 cell counts, with appreciably slower declines in patients with subtypes A, C and CRF02\_AG relative to subtype B. If ethnicity was ignored in an analysis of selected CD4 cell

1  
2  
3  
4 counts, then again these three subtypes appeared to have slower declines than patients of subtype  
5  
6  
7 B. In our descriptive analysis of ethnic and subtype effects, within each subtype patients of black  
8  
9 ethnicity had a slower decline relative to patients of other ethnicities (Figure 1a), including  
10  
11 within subtype B (although no conclusion can be drawn about subtype CRF01\_AE). Within  
12  
13 subtype B, patients of black ethnicity from Caribbean countries had a CD4 decline intermediate  
14  
15 between other patients of black ethnicity and patients of other ethnicities (Figure 1b).  
16  
17  
18

19  
20 In sensitivity analyses, we fit separate models for patients of black and other ethnicities  
21  
22 (Table 4). The results from these analyses suggest little difference between subtypes in patients  
23  
24 of other ethnicities but in patients of black ethnicity, slower declines in subtypes C and possibly  
25  
26 A and G relative to subtype B. Only subtype CRF01\_AG appeared to have a similar effect in  
27  
28 both ethnic groups. This amounts to an interaction between the effects of subtype and ethnicity;  
29  
30 however we did not have sufficient data to estimate this interaction in a single model. Our data  
31  
32 suggest that in patients of other ethnicities, there is little variation between subtypes in both  
33  
34 initial CD4 cell count and its decline (Table 5). Figure 2 shows the estimated average CD4  
35  
36 decline over 5 years for patients of black ethnicity with subtype C and for patients of other  
37  
38 ethnicities with subtype B.  
39  
40  
41  
42  
43

44  
45 Estimates of CD4 decline did not change appreciably in a joint model (Table 6). In the  
46  
47 longitudinal component of the joint model, lower initial CD4 cell count and more rapid decline  
48  
49 were associated with older age, female sex, IDU, and higher initial HIV RNA. In the time to  
50  
51 event component of the joint model, earlier ART initiation was associated with older age, female  
52  
53 sex, higher initial HIV RNA, more recent calendar time and black ethnicity. There was no  
54  
55  
56  
57  
58  
59  
60

1  
2  
3  
4 evidence from this model that subtype and ethnicity slope estimates were biased by informative  
5 censoring due to early ART.  
6  
7

8  
9 In other sensitivity analyses, we added time dependent CD8 cell count (not available  
10 from EuroSIDA); we replaced IDU with covariates for hepatitis co-infection (not available from  
11 HOMER). Subtype and ethnicity slope estimates were not materially different in these analyses.  
12  
13  
14

15  
16  
17 We report clinical outcomes using unselected CD4 cell count series (Table 7) because  
18 selected series were often censored by irregular measurement. There were no appreciable  
19 differences between subtypes and ethnicities in either the proportion of patients starting ART or  
20 the median CD4 cell count when starting. However, the median time to ART initiation was  
21 shorter among patients of black ethnicity (0.51 vs. 1.27 years – Table 7), consistent with their  
22 lower initial CD4 cell count (400 vs. 470 cells/ $\mu$ l – Table 3). Within each subtype, no more than  
23 14% of patients developed an AIDS illness and 1% of patients died during a median follow up of  
24 around two years. There was no obvious relationship between the number of these clinical events  
25 and the rate of CD4 decline by either subtype or ethnicity.  
26  
27  
28  
29  
30  
31  
32  
33  
34  
35  
36  
37  
38  
39  
40  
41  
42  
43  
44  
45  
46  
47  
48  
49  
50  
51  
52  
53  
54  
55  
56  
57  
58  
59  
60

## Interpretation

### Main findings

This is the first study to explore the effects of both viral subtype and ethnicity on CD4 decline in untreated patients during the chronic phase of HIV infection.<sup>14</sup> We focused on the chronic phase because it constitutes the longest period of untreated HIV infection. We were able to compare all of the predominant subtypes directly to one another. Indeed, the proportions of subtypes studied (other than B) mirrored their proportions in the worldwide HIV epidemic.<sup>3</sup> We found that ethnicity is the major determinant of CD4 decline; subtype differences may also exist but were small relative to the effect of ethnicity and were most apparent in patients of black ethnicity. Patients of black ethnicity had considerably slower rates of CD4 decline overall. Although the non-B subtypes, with the exception of CRF01\_AE, appeared to be associated with slower CD4 decline in models that did not include a slope for black ethnicity, these effects were greatly attenuated once this slope was included. Furthermore, in plots of CD4 decline by subtype and ethnicity, patients of black ethnicity had slower rates of CD4 decline within each subtype, including within subtype B. Together these results suggest that differences between subtypes are small relative to a broader effect of ethnicity on immunologic progression. Failure to account for ethnicity in the evaluation of subtype effects could therefore potentially lead to erroneous conclusions.

Strong associations between viral subtype and ethnicity exist. Only 5% of patients infected with subtype B and 3% of those infected with CRF01\_AE were of black ethnicity compared with more than 50% of those infected with other subtypes. We therefore examined the effects of subtype in each ethnic group separately. Among patients of other ethnicities, there was

1  
2  
3  
4 little evidence for an effect of subtype on immunologic progression. In contrast, patients of black  
5 ethnicity may have slower rates of decline when infected with subtype C (and possibly A,  
6  
7 CRF02\_AG and G) relative to subtype B. This suggests viral subtype may have different effects  
8  
9 depending on ethnicity.  
10  
11  
12

### 13 14 15 **Comparisons with other studies**

16  
17 Indeed, biological differences between subtypes do exist that might affect immunologic  
18 progression. For example, coreceptor use varies between subtypes, with A and C predominantly  
19 using the coreceptor (R5) that is associated with slower disease progression and subtype C has  
20 lower replicative fitness when compared with other viral subtypes in vitro.<sup>13</sup> Observational  
21 studies also support differences in disease progression among patients of black ethnicity infected  
22 with different viral subtypes. For example, faster immunologic progression has been reported in  
23 Ugandan and Kenyan patients infected with subtype D compared to subtype A.<sup>20-22</sup> Co-evolution  
24 of HIV-1 subtypes and African populations may reduce the virulence of more dominant  
25 subtypes, such as subtype C, possibly leading to an interaction between subtype and ethnicity.<sup>2</sup>  
26  
27 In the absence of ART, which is still the reality for the majority of HIV-infected persons in  
28 Africa, our results suggest that a patient of black ethnicity infected with a non-B subtype could  
29 take considerably longer to reach a CD4 count of 200 cells/ul (9.3 vs. 6.2 years; Table 5), the  
30 level at which the risk of AIDS increases, thus prolonging the asymptomatic period and  
31 increasing the opportunity for HIV transmission.  
32  
33  
34  
35  
36  
37  
38  
39  
40  
41  
42  
43  
44  
45  
46  
47  
48  
49  
50

51 Several previous studies both in incident<sup>23, 24</sup> and prevalent<sup>4, 16, 17</sup> cohorts have shown that  
52 that black ethnicity is associated with slower rates of CD4 decline but with one exception,<sup>23</sup> have  
53 not included subtype and ethnicity in the same analysis.<sup>14</sup> Yet it remains unclear how ethnicity  
54  
55  
56  
57  
58  
59  
60

1  
2  
3  
4 could affect the underlying pathogenesis of HIV infection.<sup>25</sup> Those classified as being of black  
5  
6 ethnicity in our study came from a large number of African and Caribbean countries, suggesting  
7  
8 no single host characteristic is likely to be responsible for differences in disease progression.  
9  
10 Differential patterns of migration and racial admixture in Caribbean black populations should  
11  
12 dilute ethnic differences as in an analysis where Haitians and Canadians (both infected with  
13  
14 subtype B) had similar rates of CD4 decline, both faster than that observed among recent African  
15  
16 immigrants.<sup>26</sup> In our study, within subtype B, Caribbeans appeared to have rates of CD4 decline  
17  
18 intermediate to those from African and other countries.  
19  
20  
21  
22  
23  
24

25 Individuals of similar ethnicity do share genetic characteristics that have been associated  
26  
27 with HIV disease progression. Examples include protective human leukocyte antigen (HLA)  
28  
29 haplotypes, chemokine and chemokine receptor polymorphisms and mutational variants in genes  
30  
31 involved in immune regulation.<sup>27, 28</sup> It is also possible that ethnicity simply serves as a marker for  
32  
33 socioeconomic, cultural and environmental factors that may influence immunologic  
34  
35 progression.<sup>25</sup> Black patients in our study were more likely to be female and of childbearing age,  
36  
37 have lower initial CD4 cell counts and initiated ART sooner. We were not able to adjust for  
38  
39 socio-demographic factors beyond age and sex. However, our joint model showed no evidence  
40  
41 of informative censoring due to early ART initiation. The healthy migrant effect is an alternate  
42  
43 explanation for differences between black and other ethnicities receiving healthcare in developed  
44  
45 countries,<sup>29</sup> but this does not explain reported differences in patients native to Africa or within  
46  
47 the United States.<sup>15, 16, 24, 30</sup> In our study, adjustment for time updated CD8 cell count – a crude  
48  
49 marker of immune activation – or for hepatitis co-infection did not affect estimates of differences  
50  
51  
52  
53  
54  
55  
56  
57  
58  
59  
60

1  
2  
3  
4 in CD4 decline. A healthy migrant effect implies that ethnic differences should be attenuated  
5  
6 after adjusting for comorbidities.  
7  
8

### 9 10 **Limitations**

11  
12 Our classification of patients as either of black or other ethnicity was rudimentary based on  
13  
14 different classifications in each cohort or derived from country of origin. We also had  
15  
16 insufficient Asian patients to study these separately. Patients included in this study were being  
17  
18 treated in countries with publicly-funded healthcare, minimising the potential effects of  
19  
20 healthcare access and quality on immunologic progression, but our results might not be  
21  
22 generalizable to resource-limited settings. We did not have enough patients with other subtypes  
23  
24 linked to faster CD4 decline, such as subtype D.<sup>20-22, 30</sup> Also, limited numbers of both subtype G  
25  
26 and subtype CRF01\_AE in black patients meant our estimates for these subtypes were imprecise.  
27  
28  
29  
30

### 31 32 **Conclusions**

33  
34 This large collaborative analysis with a broad representation of the most common circulating  
35  
36 HIV-1 subtypes worldwide suggests that ethnicity is more prognostic of immunologic  
37  
38 progression than viral subtype during untreated chronic HIV infection. While we have some  
39  
40 evidence of differences in CD4 decline between subtypes, particularly in patients of black  
41  
42 ethnicity, research to uncover the underlying biologic or sociologic reasons for slower  
43  
44 immunologic progression among black ethnicities is warranted. Further study of subtype specific  
45  
46 effects on immunologic progression will require comparisons of different subtypes in ethnically  
47  
48 homogeneous populations.  
49  
50  
51  
52  
53  
54  
55  
56  
57  
58  
59  
60



## Acknowledgements

Marina Klein had full access to the data and takes responsibility for the integrity and the accuracy of the reported findings. Jim Young conducted all data analysis, acts as guarantor for the analyses and had full access to the dataset. All authors participated in discussions on the design of the study and interpretation of the findings, and were involved in the preparation and review of the final manuscript for submission. We thank the patients and researchers who contributed to this study (Appendix). In particular we wish to acknowledge the contributions of Bernard Masquelier (Centre Hospitalier Universitaire (CHU), Hôpital Pellegrin, Laboratoire de Virologie, Bordeaux, France) who provided virologic data for ANRS CO3 Aquitaine cohort and participated in revising earlier drafts of the manuscript. Bernard passed away in March 2013. His collegiality and contributions to the field of HIV resistance will be greatly missed.

## References

1. Taylor BS, Sobieszczyk ME, McCutchan FE, Hammer SM. Medical progress: The challenge of HIV-1 subtype diversity. *N Engl J Med* 2008,358:1590-602.
2. Tebit DM, Arts EJ. Tracking a century of global expansion and evolution of HIV to drive understanding and to combat disease. *Lancet Infect Dis* 2011,11:45-56.
3. Hemelaar J, Gouws E, Ghys PD, Osmanov S. Global trends in molecular epidemiology of HIV-1 during 2000-2007. *AIDS* 2011,25:679-89.
4. Del Amo J, Broring G, Hamers FF, Infuso A, Fenton K. Monitoring HIV/AIDS in Europe's migrant communities and ethnic minorities. *AIDS* 2004,18:1867-73.
5. Public Health Agency of Canada. *HIV/AIDS Epi Updates, July 2010*. Available: [http://www.phac-aspc.gc.ca/aids-sida/publication/epi/2010/pdf/EN\\_Intro\\_Web.pdf](http://www.phac-aspc.gc.ca/aids-sida/publication/epi/2010/pdf/EN_Intro_Web.pdf) (accessed 2014 January 29).
6. Chaix ML, Seng R, Frange P, et al. Increasing HIV-1 non-B subtype primary infections in patients in France and effect of HIV subtypes on virological and immunological responses to combined antiretroviral therapy. *Clin Infect Dis* 2013,56:880-7.
7. Public Health Agency of Canada. *HIV-1 strain and transmitted drug resistance in Canada: Surveillance report to December 31, 2008*. Available: [http://publications.gc.ca/collections/collection\\_2013/aspc-phac/HP37-13-2008-eng.pdf](http://publications.gc.ca/collections/collection_2013/aspc-phac/HP37-13-2008-eng.pdf) (accessed 2014 January 29).
8. Rice BD, Elford J, Yin Z, Delpech VC. A new method to assign country of HIV infection among heterosexuals born abroad and diagnosed with HIV. *AIDS* 2012,26:1961-6.

- 1  
2  
3  
4  
5 9. Hu DJ, Vanichseni S, Mastro TD, et al. Viral load differences in early infection with two  
6  
7 HIV-1 subtypes. *AIDS* 2001,15:683-91.
- 8  
9  
10 10. Chohan B, Lang D, Sagar M, et al. Selection for human immunodeficiency virus type 1  
11  
12 envelope glycosylation variants with shorter V1-V2 loop sequences occurs during  
13  
14 transmission of certain genetic subtypes and may impact viral RNA levels. *J Virol*  
15  
16 2005,79:6528-31.
- 17  
18  
19 11. Ndung'u T, Sepako E, McLane MF, et al. HIV-1 subtype C in vitro growth and  
20  
21 coreceptor utilization. *Virology* 2006,347:247-60.
- 22  
23  
24 12. Huang W, Eshleman SH, Toma J, et al. Coreceptor tropism in human immunodeficiency  
25  
26 virus type 1 subtype D: high prevalence of CXCR4 tropism and heterogeneous  
27  
28 composition of viral populations. *J Virol* 2007,81:7885-93.
- 29  
30  
31 13. Abraha A, Nankya IL, Gibson R, et al. CCR5- and CXCR4-tropic subtype C human  
32  
33 immunodeficiency virus type 1 isolates have a lower level of pathogenic fitness than  
34  
35 other dominant group M subtypes: implications for the epidemic. *J Virol* 2009,83:5592-  
36  
37 605.
- 38  
39  
40 14. Young J, Klein MB. Virus subtype, ethnicity and CD4 decline in untreated HIV  
41  
42 infection. *Future Virol* 2014,[in press].
- 43  
44  
45 15. Anastos K, Gange SJ, Lau B, et al. Association of race and gender with HIV-1 RNA  
46  
47 levels and immunologic progression. *J Acquir Immune Defic Syndr* 2000,24:218-26.
- 48  
49  
50 16. May M, Wood R, Myer L, et al. CD4(+) T cell count decreases by ethnicity among  
51  
52 untreated patients with HIV infection in South Africa and Switzerland. *J Infect Dis*  
53  
54 2009,200:1729-35.
- 55  
56  
57  
58  
59  
60

- 1  
2  
3  
4  
5 17. Muller V, von Wyl V, Yerly S, et al. African descent is associated with slower CD4 cell  
6  
7 count decline in treatment-naive patients of the Swiss HIV Cohort Study. *AIDS*  
8  
9 2009,23:1269-76.  
10
- 11 18. Abecasis AB, Wang Y, Libin P, et al. Comparative performance of the REGA subtyping  
12  
13 tool version 2 versus version 1. *Infect Genet Evol* 2010,10:380-5.  
14  
15
- 16 19. Guo X, Carlin BP. Separate and joint modeling of longitudinal and event time data using  
17  
18 standard computer packages. *Am Stat* 2004,58:16-24.  
19  
20
- 21 20. Kaleebu P, French N, Mahe C, et al. Effect of human immunodeficiency virus (HIV) type  
22  
23 1 envelope subtypes A and D on disease progression in a large cohort of HIV-1-positive  
24  
25 persons in Uganda. *J Infect Dis* 2002,185:1244-50.  
26  
27
- 28 21. Baeten JM, Chohan B, Lavreys L, et al. HIV-1 subtype D infection is associated with  
29  
30 faster disease progression than subtype A in spite of similar plasma HIV-1 loads. *J Infect*  
31  
32 *Dis* 2007,195:1177-80.  
33  
34
- 35 22. Kiwanuka N, Robb M, Laeyendecker O, et al. HIV-1 viral subtype differences in the rate  
36  
37 of CD4+ T-cell decline among HIV seroincident antiretroviral naive persons in Rakai  
38  
39 district, Uganda. *J Acquir Immune Defic Syndr* 2010,54:180-4.  
40  
41
- 42 23. Touloumi G, Pantazis N, Pillay D, et al. Impact of HIV-1 subtype on CD4 count at HIV  
43  
44 seroconversion, rate of decline, and viral load set point in European seroconverter  
45  
46 cohorts. *Clin Infect Dis* 2013,56:888-97.  
47  
48
- 49 24. Pantazis N, Morrison C, Amornkul PN, et al. Differences in HIV natural history among  
50  
51 African and non-African seroconverters in Europe and seroconverters in sub-Saharan  
52  
53 Africa. *PLoS ONE* 2012,7:e32369.  
54  
55  
56  
57  
58  
59  
60

- 1  
2  
3  
4  
5  
6  
7  
8  
9  
10  
11  
12  
13  
14  
15  
16  
17  
18  
19  
20  
21  
22  
23  
24  
25  
26  
27  
28  
29  
30  
31  
32  
33  
34  
35  
36  
37  
38  
39  
40  
41  
42  
43  
44  
45  
46  
47  
48  
49  
50  
51  
52  
53  
54  
55  
56  
57  
58  
59  
60
25. Achhra AC, Amin J. Race and CD4(+) T-cell count in HIV prognosis and treatment. *Future Virol* 2012,7:193-203.
26. Keller M, Lu Y, Lalonde RG, Klein MB. Impact of HIV-1 viral subtype on CD4+ T-cell decline and clinical outcomes in antiretroviral naive patients receiving universal healthcare. *AIDS* 2009,23:731-7.
27. Anastassopoulou CG, Kostrikis LG. The impact of human allelic variation on HIV-1 disease. *Curr HIV Res* 2003,1:185-203.
28. Pereyra F, Jia X, McLaren PJ, et al. The major genetic determinants of HIV-1 control affect HLA class I peptide presentation. *Science* 2010,330:1551-7.
29. Lin SS, Kelsey JL. Use of race and ethnicity in epidemiologic research: concepts, methodological issues, and suggestions for research. *Epidemiol Rev* 2000,22:187-202.
30. Easterbrook PJ, Farzadegan H, Hoover DR, et al. Racial differences in rate of CD4 decline in HIV-1-infected homosexual men. *AIDS* 1996,10:1147-55.

Table 1. Cohorts contributing patients to this study.

| Cohort      | Reference | Co-author responsible for data | Number of patients contributing CD4 cells counts |          | Information available with which to assign ethnicity and region                                                                                                                                                                                                                            |
|-------------|-----------|--------------------------------|--------------------------------------------------|----------|--------------------------------------------------------------------------------------------------------------------------------------------------------------------------------------------------------------------------------------------------------------------------------------------|
|             |           |                                | Unselected                                       | Selected |                                                                                                                                                                                                                                                                                            |
| Canadian    | [1, 2]    |                                |                                                  |          |                                                                                                                                                                                                                                                                                            |
| - Calgary   |           | JG                             | 79                                               | 62       | Ethnicity (black, white, aboriginal, asian, other, missing)                                                                                                                                                                                                                                |
| - Hamilton  |           | FS                             | 30                                               | 7        | Ethnicity (black, first nations, white)<br>Country (no Caribbean countries for patients of black ethnicity)                                                                                                                                                                                |
| - HOMER     |           | RSH                            | 1831                                             | 1112     | Ethnicity (black, white, asian, first nation, hispanic, missing)                                                                                                                                                                                                                           |
| - Montreal  |           | MBK                            | 346                                              | 196      | Country (black assumed if Burundi, Cameroon, Congo, Democratic Republic of the Congo, Ethiopia, Gabon, Guinea, Ivory Coast, Morocco, Mali, Rwanda, Senegal, South Africa, Tchad, Zimbabwe, Barbados, Dominican Republic, Haiti, Jamaica, Martinique, Saint Lucia – last six are Caribbean) |
| - Ottawa    |           | CC                             | 65                                               | 50       | Country (black assumed if Angola, Burundi, Congo, Ethiopia, Haiti, Rwanda, Somalia, Zambia)                                                                                                                                                                                                |
| - Toronto   |           | SW                             | 187                                              | 125      | Ethnicity (black, white, asian, south asian, other, missing)<br>Country (Barbados, Cuba, Dominica, Grenada, Haiti, Jamaica, Trinidad & Tobago listed)                                                                                                                                      |
| European    |           |                                |                                                  |          |                                                                                                                                                                                                                                                                                            |
| - Aquitaine | [3]       | FD                             | 442                                              | 348      | Not available                                                                                                                                                                                                                                                                              |
| - Eurosidea | [4]       | AC                             | 349                                              | 267      | Ethnicity (black, white, asian, missing)<br>Country (no Caribbean countries for patients of black ethnicity)                                                                                                                                                                               |

|           |     |    |      |      |                                                                                                                              |
|-----------|-----|----|------|------|------------------------------------------------------------------------------------------------------------------------------|
| - SHCS    | [5] | BL | 2802 | 2087 | Ethnicity (black, white, hispanic, asian, other, missing)<br>Region (Caribbean)                                              |
| - UK CHIC | [6] | CS | 7551 | 5518 | Ethnicity (black, white, indian, other, missing)<br>Country (Barbados, Bermuda, Cuba, Jamaica, Saint Kitts and Nevis listed) |

---

SHCS, Swiss HIV Cohort Study; UK CHIC, UK Collaborative HIV Cohort Study; HOMER, HAART Observational Medical Evaluation and Research Study

1. Palmer AK, Klein MB, Raboud J, et al. Cohort profile: the Canadian Observational Cohort collaboration. *Int J Epidemiol* 2011,40:25-32.
2. May MT, Ingle SM, Costagliola D, et al. Cohort profile: Antiretroviral Therapy Cohort Collaboration (ART-CC). *Int J Epidemiol* 2013.
3. Dabis F. *ANRS CO3 Aquitaine: Cohortes dans l'infection par le VIH et hépatites, co-Infection menées sous l'égide de l'ANRS (Janvier 2013)*. Available: [http://www.anrs.fr/content/download/777/5213/file/Anrs\\_CO3\\_Aquitaine.pdf](http://www.anrs.fr/content/download/777/5213/file/Anrs_CO3_Aquitaine.pdf) (accessed 2014 January 28).
4. Paulsen MA, Mocroft A, Ellefson M, Kirk O, Grarup J. *EuroSIDA a multicentre study, 1994-2009*. Available: <http://www.cphiv.dk/EuroSIDA/Publications/EuroSIDAamulticentrestudy19942009/tabid/407/Default.aspx> (accessed 2014 January 28).
5. Schoeni-Affolter F, Ledergerber B, Rickenbach M, et al. Cohort profile: the Swiss HIV Cohort study. *Int J Epidemiol* 2010,39:1179-89.
6. Babiker A, Dunn D, Easterbrook P, et al. The creation of a large UK-based multicentre cohort of HIV-infected individuals: The UK Collaborative HIV Cohort (UK CHIC) Study. *HIV Med* 2004,5:115-24.

Table 2. Initial characteristics according to HIV-1 viral subtype – median or proportion (n missing).

|                                   | A<br>n=356   | AE<br>n=193  | AG<br>n=352  | B<br>n=7937    | C<br>n=822    | G<br>n=112   | Total<br>n=9772 |
|-----------------------------------|--------------|--------------|--------------|----------------|---------------|--------------|-----------------|
| Age (years)                       | 34           | 38           | 34           | 35             | 33            | 33           | 35              |
| Sex (female)                      | 0.53         | 0.24         | 0.57         | 0.11           | 0.59          | 0.48         | 0.19            |
| Mode of transmission              |              |              |              |                |               |              |                 |
| - Heterosexual                    | 0.70         | 0.58         | 0.74         | 0.10           | 0.71          | 0.71         | 0.21            |
| - Homosexual                      | 0.14         | 0.32         | 0.12         | 0.67           | 0.09          | 0.15         | 0.57            |
| - Injection drug use              | 0.06         | 0.03         | 0.00         | 0.12           | 0.02          | 0.08         | 0.11            |
| - Other or unknown                | 0.10         | 0.08         | 0.14         | 0.11           | 0.18          | 0.06         | 0.11            |
| Black ethnicity                   | 0.49<br>(20) | 0.03<br>(13) | 0.60<br>(52) | 0.05<br>(973)  | 0.72<br>(30)  | 0.55<br>(8)  | 0.15<br>(1096)  |
| Hepatitis C                       | 0.10<br>(43) | 0.06<br>(18) | 0.03<br>(22) | 0.18<br>(1094) | 0.04<br>(172) | 0.13<br>(15) | 0.16<br>(1364)  |
| Hepatitis B                       | 0.05<br>(42) | 0.03<br>(19) | 0.06<br>(31) | 0.04<br>(1550) | 0.04<br>(163) | 0.02<br>(14) | 0.04<br>(1819)  |
| Calendar year of cohort enrolment |              |              |              |                |               |              |                 |
| <2000                             | 0.15         | 0.09         | 0.06         | 0.22           | 0.07          | 0.07         | 0.20            |
| 2000 - <2005                      | 0.44         | 0.39         | 0.38         | 0.38           | 0.39          | 0.28         | 0.39            |
| 2005 - <2010                      | 0.41         | 0.51         | 0.56         | 0.39           | 0.54          | 0.65         | 0.42            |
| Number of CD4 measures            | 6            | 6            | 5            | 6              | 5             | 5            | 6               |
| CD4 (cells/ul)                    | 420          | 450          | 440          | 470            | 400           | 420          | 460             |
| CD4%                              | 24<br>(73)   | 27<br>(32)   | 24<br>(42)   | 26<br>(901)    | 23<br>(143)   | 23<br>(17)   | 26<br>(1208)    |
| CD8 (cells/ul)                    | 910<br>(82)  | 900<br>(39)  | 860<br>(50)  | 930<br>(1125)  | 900<br>(177)  | 850<br>(18)  | 920<br>(1491)   |
| HIV RNA (log copies/ml)           | 4.1<br>(13)  | 4.2<br>(1)   | 4.1<br>(2)   | 4.4<br>(44)    | 4.0<br>(9)    | 4.1          | 4.3<br>(69)     |
| Follow up time (years)            | 1.59         | 1.78         | 1.40         | 1.75           | 1.39          | 1.51         | 1.69            |



Table 3. Initial characteristics by ethnicity – median or proportion (n unknown).

|                         | Black ethnicity<br>n=1303 | Other ethnicities<br>n=7373 | Unknown ethnicity<br>n=1096 | Total<br>n=9772 |
|-------------------------|---------------------------|-----------------------------|-----------------------------|-----------------|
| Age (years)             | 33                        | 35                          | 36                          | 35              |
| Sex (female)            | 0.55                      | 0.12                        | 0.19                        | 0.19            |
| Mode of transmission    |                           |                             |                             |                 |
| - Heterosexual          | 0.68                      | 0.14                        | 0.13                        | 0.21            |
| - Homosexual            | 0.15                      | 0.68                        | 0.35                        | 0.57            |
| - Injection drug use    | 0.01                      | 0.11                        | 0.17                        | 0.11            |
| - Other or unknown      | 0.15                      | 0.07                        | 0.36                        | 0.11            |
| Hepatitis C             | 0.03<br>(201)             | 0.18<br>(810)               | 0.19<br>(353)               | 0.16<br>(1364)  |
| Hepatitis B             | 0.06<br>(192)             | 0.04<br>(1078)              | 0.02<br>(549)               | 0.04<br>(1819)  |
| Calendar year <2000     | 0.09                      | 0.21                        | 0.22                        | 0.20            |
| 2000 - <2005            | 0.40                      | 0.38                        | 0.43                        | 0.39            |
| 2005 - <2010            | 0.51                      | 0.41                        | 0.35                        | 0.42            |
| Number of CD4 measures  | 5                         | 6                           | 5                           | 6               |
| CD4 (cells/ul)          | 400                       | 470                         | 470                         | 460             |
| CD4%                    | 23<br>(225)               | 26<br>(932)                 | 26<br>(51)                  | 26<br>(1208)    |
| CD8 (cells/ul)          | 880<br>(275)              | 940<br>(1163)               | 900<br>(53)                 | 920<br>(1491)   |
| HIV RNA (log copies/ml) | 4.0<br>(10)               | 4.4<br>(56)                 | 4.5<br>(3)                  | 4.3<br>(69)     |
| Follow up time (years)  | 1.42                      | 1.76                        | 1.56                        | 1.69            |

Table 4. Change over time in square root CD4 cell count according to HIV-1 viral subtype and ethnicity.

| Slope estimate [95% CI]<br>Analysis of:<br>Mixed model <sup>3</sup> :                                 | Selected CD4 cell counts <sup>1</sup> |                |                   |                |                      |                |       |                |                        |                | Unselected CD4 cell counts <sup>2</sup> |  |
|-------------------------------------------------------------------------------------------------------|---------------------------------------|----------------|-------------------|----------------|----------------------|----------------|-------|----------------|------------------------|----------------|-----------------------------------------|--|
|                                                                                                       | All patients                          |                |                   |                | Black ethnicity only |                |       |                | Other ethnicities only |                | All patients                            |  |
|                                                                                                       | Ethnicity included                    |                | Ethnicity ignored |                |                      |                |       |                | Ethnicity included     |                |                                         |  |
| Change per year: patients of other ethnicities with subtype B                                         |                                       |                |                   |                |                      |                |       |                |                        |                |                                         |  |
|                                                                                                       | -1.23                                 | [-1.27, -1.19] | -1.21             | [-1.25, -1.17] | -0.88                | [-1.03, -0.73] | -1.23 | [-1.27, -1.19] | -1.35                  | [-1.40, -1.31] |                                         |  |
| Difference in change per year: relative to the change in patients of other ethnicities with subtype B |                                       |                |                   |                |                      |                |       |                |                        |                |                                         |  |
| Subtype A                                                                                             | 0.06                                  | [-0.13, 0.25]  | 0.21              | [0.02, 0.39]   | 0.22                 | [-0.04, 0.49]  | 0.03  | [-0.22, 0.28]  | 0.30                   | [0.10, 0.49]   |                                         |  |
| AE                                                                                                    | -0.03                                 | [-0.26, 0.21]  | -0.05             | [-0.28, 0.19]  | -3.2 <sup>4</sup>    | [-8.6, 2.2]    | -0.04 | [-0.28, 0.20]  | 0.03                   | [-0.23, 0.28]  |                                         |  |
| AG                                                                                                    | 0.17                                  | [-0.04, 0.39]  | 0.34              | [0.13, 0.55]   | 0.26                 | [-0.02, 0.54]  | 0.24  | [-0.08, 0.55]  | 0.23                   | [0.00, 0.46]   |                                         |  |
| C                                                                                                     | 0.11                                  | [-0.04, 0.27]  | 0.32              | [0.19, 0.46]   | 0.32                 | [0.12, 0.52]   | -0.02 | [-0.24, 0.20]  | 0.31                   | [0.15, 0.47]   |                                         |  |
| G                                                                                                     | 0.02                                  | [-0.32, 0.36]  | 0.19              | [-0.14, 0.52]  | 0.46                 | [0.06, 0.86]   | -0.42 | [-0.92, 0.09]  | 0.00                   | [-0.37, 0.36]  |                                         |  |
| Black ethnicity                                                                                       | 0.37                                  | [0.25, 0.50]   | -                 |                | -                    |                | -     |                | 0.44                   | [0.31, 0.57]   |                                         |  |

<sup>1</sup> Patients aged 16 or over after January 1998 with CD4 cell counts likely to be within the stable phase of chronic untreated HIV infection.

<sup>2</sup> All CD4 cell counts for patients aged 16 and over after January 1998.

<sup>3</sup> Mixed model with a random intercept and random slope for each patient; all cohorts excluding Aquitaine; with intercepts for cohort and with both intercepts and slopes for age, sex, ethnicity, initial HIV RNA, and likely transmission by injection drug use.

<sup>4</sup> Few patients of black ethnicity had subtype AE – hence this point estimate is unreliable.

Table 5. Initial CD4 cell count and change over time according to HIV-1 viral subtype – results from separate mixed models for black and other ethnicities fit to the original CD4 cell counts with a random intercept and random slope for each patient.

|                                          | CD4 cell count                |            |                                       |            |
|------------------------------------------|-------------------------------|------------|---------------------------------------|------------|
|                                          | Initial <sup>1</sup> [95% CI] |            | Change per year <sup>2</sup> [95% CI] |            |
| Model for patients of black ethnicity:   |                               |            |                                       |            |
| Subtype B                                | 477                           | [447, 507] | -35                                   | [-42, -28] |
| Subtype A                                | 392                           | [353, 430] | -23                                   | [-35, -12] |
| Subtype AE                               | 348 <sup>3</sup>              | [173, 523] | -146 <sup>3</sup>                     | [-386, 95] |
| Subtype AG                               | 398                           | [361, 435] | -23                                   | [-35, -11] |
| Subtype C                                | 395                           | [366, 425] | -19                                   | [-27, -11] |
| Subtype G                                | 413                           | [361, 465] | -13                                   | [-31, 5]   |
| Model for patients of other ethnicities: |                               |            |                                       |            |
| Subtype B                                | 492                           | [469, 516] | -49                                   | [-51, -47] |
| Subtype A                                | 480                           | [441, 519] | -49                                   | [-59, -38] |
| Subtype AE                               | 484                           | [447, 522] | -50                                   | [-60, -40] |
| Subtype AG                               | 505                           | [462, 548] | -41                                   | [-54, -27] |
| Subtype C                                | 489                           | [454, 524] | -52                                   | [-62, -43] |
| Subtype G                                | 468                           | [406, 530] | -60                                   | [-82, -38] |

1  
2  
3  
4  
5 <sup>1</sup> Covariate adjustment implies a reference patient treated in a Canadian cohort, male, 35 years old,  
6 not infected through injection drug use and with an initial HIV RNA of 4 log 10 copies.  
7

8 <sup>2</sup> For example, these estimates imply that a black reference patient with subtype C and a CD4 cell  
9 count of 395 cells/ul would take on average 2.4 years to reach a CD4 cell count below 350 cells/ul  
10  $([395-350])/19$ , whereas a reference patient of another ethnicity with subtype B and a CD4 cell  
11 count of 492 cells/ul would take on average 2.9 years to reach this threshold  $([492-350])/49$ . Note  
12 that according to mixed models for square root CD4 cell count, the first of these two patients would  
13 take 1.2 years to reach a threshold of 350 cells/ul while the second patient would take 2.5 years.  
14 However, to reach a threshold of 200 cells/ul, the first patient would take 9.3 years while the second  
15 patient would take 6.2 years.  
16  
17  
18  
19

20  
21 <sup>3</sup> Few patients of black ethnicity had subtype AE – hence these point estimates are unreliable.  
22  
23  
24  
25  
26  
27  
28  
29  
30  
31  
32  
33  
34  
35  
36  
37  
38  
39  
40  
41  
42  
43  
44  
45  
46  
47  
48  
49  
50  
51  
52  
53  
54  
55  
56  
57  
58  
59  
60

Table 6. Full results from the main mixed model for square root CD4 cell decline and from an exponential accelerated failure time (AFT) model for time to initiation of antiretroviral therapy, as separate models and as a joint model (all models without patients from the Aquitaine cohort).

| Mixed model                                                      | Separate models |                | Joint model |                |
|------------------------------------------------------------------|-----------------|----------------|-------------|----------------|
|                                                                  | Estimate        | 95% CI         | Estimate    | 95% CI         |
| Starting CD4 cell count ([cells/ul] <sup>1/2</sup> )             |                 |                |             |                |
| Reference patient <sup>1</sup>                                   | 21.88           | [21.47, 22.29] | 22.02       | [21.60, 22.43] |
| Female                                                           | -0.20           | [-0.49, 0.08]  | -0.24       | [-0.51, 0.04]  |
| IDU <sup>2</sup>                                                 | -1.16           | [-1.50, -0.82] | -1.12       | [-1.49, -0.78] |
| Age (per 10 years)                                               | -0.19           | [-0.29, -0.08] | -0.18       | [-0.29, -0.07] |
| Log <sub>10</sub> HIV RNA (per log copy)                         | -1.51           | [-1.62, -1.40] | -1.51       | [-1.62, -1.40] |
| Cohort (reference ROC <sup>3</sup> )                             |                 |                |             |                |
| - EuroSIDA                                                       | 1.55            | [0.88, 2.21]   | 1.36        | [0.69, 2.03]   |
| - HOMER                                                          | -0.77           | [-1.32, -0.23] | -0.98       | [-1.53, -0.43] |
| - Swiss HIV Cohort Study                                         | 1.10            | [0.66, 1.55]   | 0.95        | [0.50, 1.39]   |
| - UK CHIC                                                        | 0.82            | [0.41, 1.24]   | 0.71        | [0.29, 1.13]   |
| Subtype (reference B)                                            |                 |                |             |                |
| - A                                                              | -0.69           | [-1.20, -0.18] | -0.63       | [-1.12, -0.14] |
| - AE                                                             | -0.24           | [-0.88, 0.40]  | -0.20       | [-0.81, 0.40]  |
| - AG                                                             | -0.43           | [-0.98, 0.11]  | -0.39       | [-0.91, 0.13]  |
| - C                                                              | -0.78           | [-1.18, -0.38] | -0.71       | [-1.10, -0.33] |
| - G <sup>4</sup>                                                 | -0.58           | [-1.43, 0.27]  | -           | -              |
| Black ethnicity                                                  | -1.57           | [-1.91, -1.23] | -1.60       | [-1.94, -1.25] |
| Rate of CD4 cell count decline ([cells/ul] <sup>1/2</sup> /year) |                 |                |             |                |
| Reference patient <sup>1</sup>                                   | -1.23           | [-1.27, -1.19] | -1.29       | [-1.34, -1.25] |
| Female                                                           | -0.08           | [-0.19, 0.02]  | -0.13       | [-0.23, -0.02] |
| IDU <sup>2</sup>                                                 | -0.10           | [-0.22, 0.02]  | -0.16       | [-0.28, -0.04] |
| Age (per 10 years)                                               | -0.09           | [-0.13, -0.05] | -0.11       | [-0.15, -0.07] |
| Log <sub>10</sub> HIV RNA (per log copy)                         | -0.28           | [-0.32, -0.23] | -0.30       | [-0.34, -0.26] |
| Subtype (reference B)                                            |                 |                |             |                |
| - A                                                              | 0.06            | [-0.13, 0.25]  | 0.08        | [-0.10, 0.26]  |
| - AE                                                             | -0.03           | [-0.26, 0.21]  | -0.01       | [-0.24, 0.21]  |
| - AG                                                             | 0.17            | [-0.04, 0.39]  | 0.17        | [-0.04, 0.38]  |

1  
2  
3  
4  
5  
6  
7  
8  
9  
10  
11  
12  
13  
14  
15  
16  
17  
18  
19  
20  
21  
22  
23  
24  
25  
26  
27  
28  
29  
30  
31  
32  
33  
34  
35  
36  
37  
38  
39  
40  
41  
42  
43  
44  
45  
46  
47  
48  
49  
50  
51  
52  
53  
54  
55  
56  
57  
58  
59  
60

|                                      |          |                |          |                |
|--------------------------------------|----------|----------------|----------|----------------|
| - C                                  | 0.11     | [-0.04, 0.27]  | 0.14     | [0.00, 0.29]   |
| - G <sup>4</sup>                     | 0.02     | [-0.32, 0.36]  | -        | -              |
| Black ethnicity                      | 0.37     | [0.25, 0.50]   | 0.29     | [0.17, 0.42]   |
| <hr/>                                |          |                |          |                |
| AFT model                            | Estimate | 95% CI         | Estimate | 95% CI         |
| Reference patient <sup>1</sup>       | 1.60     | [1.44, 1.76]   | 1.81     | [1.62, 2.00]   |
| Female                               | -0.21    | [-0.31, -0.11] | -0.26    | [-0.38, -0.15] |
| IDU <sup>2</sup>                     | 0.04     | [-0.08, 0.17]  | -0.05    | [-0.19, 0.10]  |
| Age (per 10 years)                   | -0.07    | [-0.11, -0.03] | -0.11    | [-0.15, -0.06] |
| Log <sub>10</sub> HIV RNA            | -0.37    | [-0.41, -0.32] | -0.54    | [-0.60, -0.48] |
| Cohort (reference ROC <sup>3</sup> ) |          |                |          |                |
| - EuroSIDA                           | 0.01     | [-0.24, 0.26]  | 0.05     | [-0.23, 0.33]  |
| - HOMER                              | -0.14    | [-0.35, 0.07]  | -0.10    | [-0.34, 0.14]  |
| - Swiss HIV Cohort Study             | -0.10    | [-0.28, 0.07]  | -0.02    | [-0.21, 0.18]  |
| - UK CHIC                            | 0.54     | [0.37, 0.71]   | 0.62     | [0.43, 0.81]   |
| Calendar time (per 10 years)         | -0.66    | [-0.78, -0.53] | -0.34    | [-0.47, -0.21] |
| Black ethnicity                      | -0.10    | [-0.21, 0.02]  | -0.33    | [-0.47, -0.19] |
| CD4 (square root)                    | 0.12     | [0.11, 0.13]   | 0.02     | [0.00, 0.04]   |

<sup>1</sup> Covariate adjustment implies a reference patient treated in a Canadian cohort,, male, 35 years old, not infected through injection drug use, with a starting HIV RNA of 4 log 10 copies, infected with subtype B and not of black ethnicity.

<sup>2</sup> Transmission most likely by injection drug use.

<sup>3</sup> Rest of Canada – Calgary, Hamilton, Montreal, Ottawa and Toronto cohorts.

<sup>4</sup> A joint model including patients with subtype G gave implausible parameter estimates.

Table 7. Clinical outcomes in unselected CD4 cell counts by subtype and ethnicity - median or proportion (n).

|                   |         | Outcome                |                                |                          |                              |                                |     |  | CD4 cell count prior to ART initiation (cells/ul) |
|-------------------|---------|------------------------|--------------------------------|--------------------------|------------------------------|--------------------------------|-----|--|---------------------------------------------------|
|                   |         | Follow up time (years) | AIDS event before starting ART | Died before starting ART | Started ART during follow up | Time to ART initiation (years) |     |  |                                                   |
| Subtype A         | (566)   | 2.1                    | 0.13 (75)                      | 0.01 (5)                 | 0.74 (419)                   | 0.77                           | 240 |  |                                                   |
| Subtype AE        | (274)   | 2.0                    | 0.14 (38)                      | 0.00 (0)                 | 0.74 (203)                   | 0.90                           | 220 |  |                                                   |
| Subtype AG        | (527)   | 1.7                    | 0.09 (50)                      | 0.00 (2)                 | 0.70 (368)                   | 0.49                           | 240 |  |                                                   |
| Subtype B         | (10787) | 2.3                    | 0.11 (1206)                    | 0.00 (53)                | 0.73 (7870)                  | 1.28                           | 230 |  |                                                   |
| Subtype C         | (1351)  | 1.7                    | 0.14 (187)                     | 0.00 (4)                 | 0.69 (933)                   | 0.46                           | 210 |  |                                                   |
| Subtype G         | (177)   | 1.6                    | 0.08 (14)                      | 0.01 (1)                 | 0.68 (121)                   | 0.44                           | 220 |  |                                                   |
| Black ethnicity   | (2086)  | 1.8                    | 0.13 (275)                     | 0.00 (6)                 | 0.71 (1476)                  | 0.51                           | 220 |  |                                                   |
| Other ethnicities | (10006) | 2.3                    | 0.12 (1159)                    | 0.01 (54)                | 0.71 (7062)                  | 1.27                           | 230 |  |                                                   |
| Missing ethnicity | (1590)  | 2.1                    | 0.09 (136)                     | 0.00 (5)                 | 0.87 (1376)                  | 1.16                           | 230 |  |                                                   |
| Total             | (13682) | 2.2                    | 0.11 (1570)                    | 0.00 (65)                | 0.72 (9914)                  | 1.10                           | 230 |  |                                                   |

1  
2  
3  
4  
5  
6  
7  
8  
9  
10  
11  
12  
13  
14  
15  
16  
17  
18  
19  
20  
21  
22  
23  
24  
25  
26  
27  
28  
29  
30  
31  
32  
33  
34  
35  
36  
37  
38  
39  
40  
41  
42  
43  
44  
45  
46  
47  
48  
49  
50  
51  
52  
53  
54  
55  
56  
57  
58  
59  
60

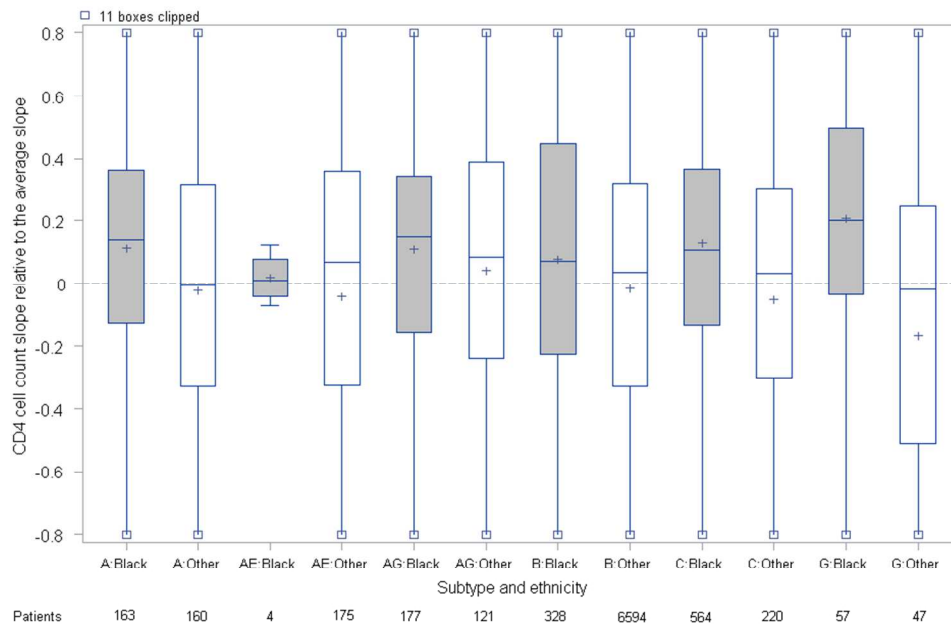

Figure 1a. Estimated CD4 slope decline for each patient. Random effects representing each patient's CD4 cell decline (relative to the average slope) estimated in a mixed model without ethnicity or subtype slope parameters, but adjusted for covariates selected because of their potential effect on initial CD4 cell count (age, sex, initial HIV RNA, transmission by injection drug use (IDU), cohort, ethnicity and subtype) or on its decline (age, sex, initial HIV RNA, IDU). All cohorts included except Aquitaine. The '+' symbol denotes the mean.

249x164mm (100 x 100 DPI)



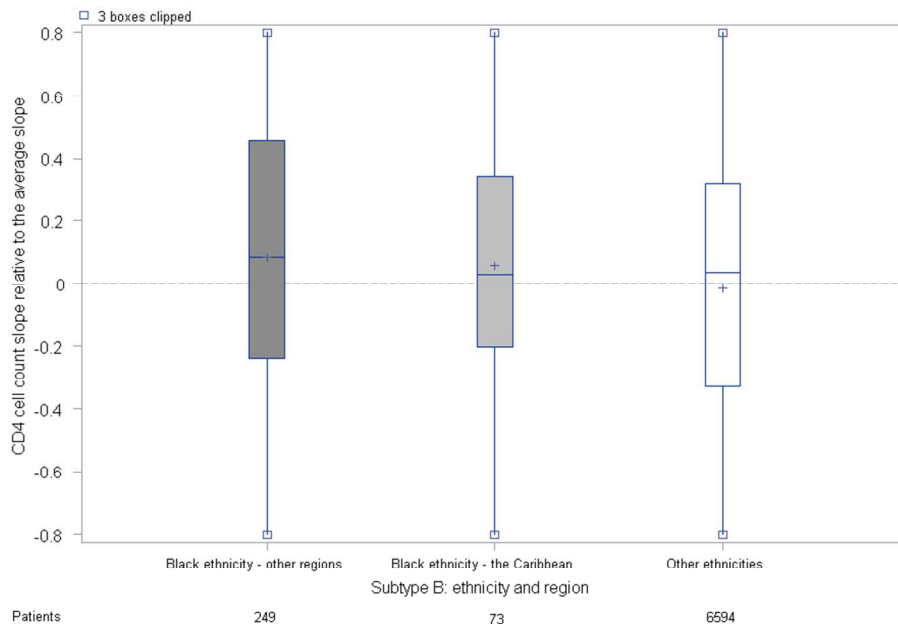

Figure 1b. Estimated CD4 slope decline for each patient with subtype B.

Random effects representing each patient's CD4 cell decline (relative to the average slope) estimated in a mixed model without ethnicity or subtype slope parameters, but adjusted for covariates selected because of their potential effect on initial CD4 cell count (age, sex, initial HIV RNA, transmission by injection drug use (IDU), cohort, ethnicity and subtype) or on its decline (age, sex, initial HIV RNA, IDU). All cohorts included except Aquitaine. The '+' symbol denotes the mean.

249x164mm (100 x 100 DPI)

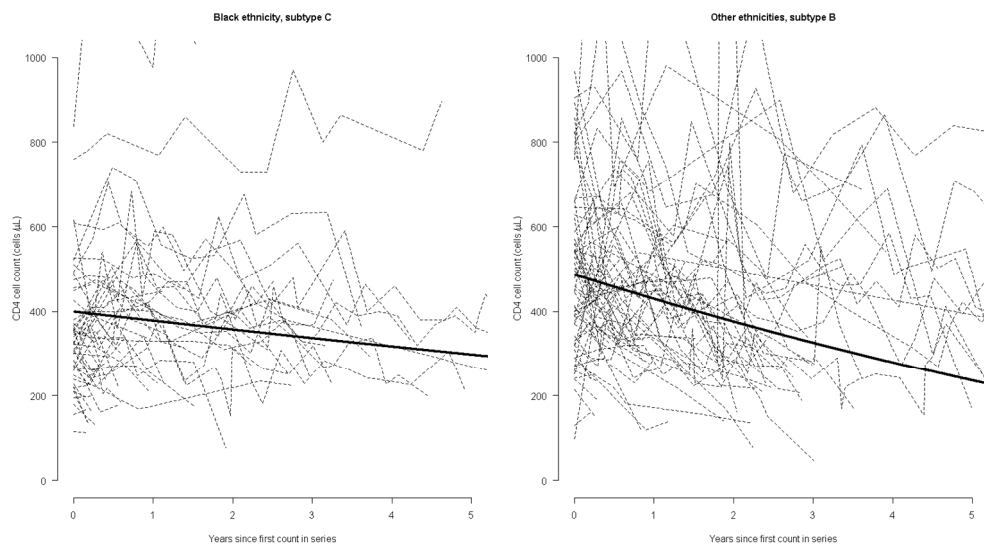

Figure 2. Estimated average CD4 cell count over 5 years.

The average CD4 cell count estimated for patients of black ethnicity with subtype C and for patients of other ethnicities with subtype B. Estimates were made using separate mixed models, for black or other ethnicities respectively, and represent CD4 cell counts for a male patient, not infected by injection drug use (IDU) and with age and initial HIV RNA set at the median for that ethnicity and subtype. Each mixed model was adjusted for covariates selected because of their potential effect on initial CD4 cell count (age, sex, initial HIV RNA, IDU, cohort and subtype) or on its decline (age, sex, initial HIV RNA, IDU and subtype). Patient CD4 cell trajectories are shown for a 10% sample of those of black ethnicity with subtype C and for a 1% sample of those of other ethnicities with subtype B to illustrate the variability of CD4 cell counts both between patients and over time.

592x334mm (72 x 72 DPI)

1  
2  
3 **Appendix. Membership of contributing cohorts.**  
4

5  
6 **Montreal Chest Institute Chronic Viral Illness Cohort**, Montreal, Quebec. Richard Lalonde  
7  
8 (Director); Marina B. Klein (Coordination); Contributing clinicians: Norbert Gilmore, Jean-  
9  
10 Pierre Routy, Roger Leblanc, Alexandra dePokomandy, Martin Potter, Charles Frennette, Martin  
11  
12 Teltscher; Data management: Costas Pexos.  
13

14  
15 **HAART Observational Medical Evaluation and Research (HOMER) study**, Vancouver,  
16  
17 British Columbia. Scientific Committee: Robert S. Hogg, Julio Montaner, David Moore, Richard  
18  
19 Harrigan, Mark Hull; Data Analysts: Benita Yip, Guillaume Colley, William Chau, Yalin Chen,  
20  
21 Julia Zhu, Susan Shurgold; Statisticians: Viviane Lima, Zishan Cui, Jeong Min, Wendy Zhang,  
22  
23 Keith Chan.  
24  
25

26  
27  
28 **Southern Alberta Clinic Cohort**, Calgary Alberta. John Gill  
29

30  
31 **Toronto General Hospital Cohort**, Toronto Ontario. Sharon Walmsley and Darrell Tan.  
32

33  
34 **Ottawa General Hospital**, Ottawa, Ontario. Curtis Cooper  
35

36  
37 **McMaster University**, Hamilton Ontario. Fiona Smaill.  
38

39  
40 **UK CHIC. Steering Committee:** Jonathan Ainsworth, Jane Anderson, Abdel Babiker, Loveleen  
41  
42 Bansi, David Chadwick, Valerie Delpech, David Dunn, Martin Fisher, Brian Gazzard, Richard  
43  
44 Gilson, Mark Gompels, Teresa Hill, Margaret Johnson, Clifford Leen, Mark Nelson, Chloe  
45  
46 Orkin, Adrian Palfreeman, Andrew Phillips, Deenan Pillay, Frank Post, Caroline Sabin (PI),  
47  
48 Memory Sachikonye, Achim Schwenk, John Walsh.  
49

50  
51 *Central Co-ordination:* University College London (Loveleen Bansi, Teresa Hill, Susie  
52  
53 Huntington, Andrew Phillips, Caroline Sabin); Medical Research Council Clinical Trials Unit  
54  
55  
56  
57  
58  
59  
60

1  
2  
3 (MRC CTU), London (David Dunn, Adam Glabay). Participating Centres: Barts and The  
4  
5 London NHS Trust, London (C Orkin, N Garrett, J Lynch, J Hand, C de Souza); Brighton and  
6  
7 Sussex University Hospitals NHS Trust (M Fisher, N Perry, S Tilbury, D Churchill); Chelsea  
8  
9 and Westminster Hospital NHS Trust, London (B Gazzard, M Nelson, M Waxman, D Asboe, S  
10  
11 Mandalia); Health Protection Agency – Centre for Infections London (HPA) (V Delpuch);  
12  
13 Homerton University Hospital NHS Trust, London (J Anderson, S Munshi); King’s College  
14  
15 Hospital NHS Foundation Trust, London (F Post, H Korat, C Taylor, Z Gleisner, F Ibrahim, L  
16  
17 Campbell); Mortimer Market Centre, London (R Gilson, N Brima, I Williams); North Middlesex  
18  
19 University Hospital NHS Trust, London (A Schwenk, J Ainsworth, C Wood, S Miller); Royal  
20  
21 Free NHS Trust and UCL Medical School, London (M Johnson, M Youle, F Lampe, C Smith, H  
22  
23 Grabowska, C Chaloner, D Puradiredja); St. Mary’s Hospital, London (J Walsh, J Weber, F  
24  
25 Ramzan, N Mackie, A Winston); The Lothian University Hospitals NHS Trust, Edinburgh (C  
26  
27 Leen, A Wilson); North Bristol NHS Trust (M Gompels, S Allan); University of Leicester NHS  
28  
29 Trust (A Palfreeman, A Moore); South Tees Hospitals NHS Foundation Trust (D Chadwick, K  
30  
31 Wakeman).

32  
33 **UK HIV Drug Resistance Database. Steering Committee:** Celia Aitken, Gartnavel General  
34  
35 Hospital, Glasgow; David Asboe, Anton Pozniak, Chelsea & Westminster Hospital, London;  
36  
37 Clare Booth, Royal Free NHS Trust, London; Patricia Cane, Health Protection Agency, Porton  
38  
39 Down; Hannah Castro, David Dunn, David Dolling, Esther Fearnhill, Kholoud Porter, MRC  
40  
41 Clinical Trials Unit, London; David Chadwick, South Tees Hospitals NHS Trust,  
42  
43 Middlesbrough; Duncan Churchill, Brighton and Sussex University Hospitals NHS Trust;  
44  
45 Duncan Clark, St Bartholomew's and The London NHS Trust; Simon Collins, HIV i-Base,  
46  
47 London; Valerie Delpuch, Health Protection Agency, Centre for Infections, London; Anna Maria  
48  
49  
50  
51  
52  
53  
54  
55  
56  
57  
58  
59  
60

1  
2  
3 Geretti, University of Liverpool; David Goldberg, Health Protection Scotland, Glasgow; Antony  
4  
5 Hale, Leeds Teaching Hospitals NHS Trust; Stéphane Hué, University College London; Steve  
6  
7 Kaye, Imperial College London; Paul Kellam, Wellcome Trust Sanger Institute & UCL Medical  
8  
9 School; Linda Lazarus, Expert Advisory Group on AIDS Secretariat, Health Protection Agency,  
10  
11 London; Andrew Leigh-Brown, University of Edinburgh; Nicola Mackie, Imperial NHS Trust;  
12  
13 Chloe Orkin, St. Bartholomew's Hospital, London; Philip Rice, St George's Healthcare Trust,  
14  
15 London; Deenan Pillay, Andrew Phillips, Caroline Sabin, University College London Medical  
16  
17 School; Erasmus Smit, Health Protection Agency, Birmingham Heartlands Hospital; Kate  
18  
19 Templeton, Royal Infirmary of Edinburgh; Peter Tilston, Manchester Royal Infirmary; William  
20  
21 Tong, Guy's and St. Thomas' NHS Foundation Trust, London; Ian Williams, Mortimer Market  
22  
23 Centre, London; Hongyi Zhang, Addenbrooke's Hospital, Cambridge; Mark Zuckerman, King's  
24  
25 College Hospital, London.  
26  
27  
28  
29  
30  
31

32 **Swiss HIV Cohort Study.** *Scientific Board:* Aubert V, Barth J, Battegay M, Bernasconi E, Böni  
33  
34 J, Bucher HC, Burton-Jeangros C, Calmy A, Cavassini M, Egger M, Elzi L, Fehr J, Fellay J,  
35  
36 Francioli P, Furrer H (Chairman of the Clinical and Laboratory Committee), Fux CA, Gorgievski  
37  
38 M, Günthard H (President of the SHCS), Haerry D (deputy of "Positive Council"), Hasse B,  
39  
40 Hirsch HH, Hirschel B, Hösli I, Kahlert C, Kaiser L, Keiser O, Kind C, Klimkait T, Kovari H,  
41  
42 Ledergerber B, Martinetti G, Martinez de Tejada B, Metzner K, Müller N, Nadal D, Pantaleo G,  
43  
44 Rauch A (Chairman of the Scientific Board), Regenass S, Rickenbach M (Head of Data Center),  
45  
46 Rudin C (Chairman of the Mother & Child Substudy), Schmid P, Schultze D, Schöni-Affolter F,  
47  
48 Schüpbach J, Speck R, Taffé P, Tarr P, Telenti A, Trkola A, Vernazza P, Weber R, Yerly S.  
49  
50  
51  
52  
53

54 **The multi-centre study group on EuroSIDA** (national coordinators in parenthesis).  
55  
56  
57  
58  
59  
60

1  
2  
3 **Argentina:** (M Losso), M Kundro, Hospital JM Ramos Mejia, Buenos Aires.

4  
5 **Austria:** (N Vetter), Pulmologisches Zentrum der Stadt Wien, Vienna; R Zangerle, Medical  
6  
7  
8 University Innsbruck, Innsbruck.

9  
10 **Belarus:** (I Karpov), A Vassilenko, Belarus State Medical University, Minsk, VM Mitsura,  
11  
12 Gomel State Medical University, Gomel; O Suetnov, Regional AIDS Centre, Svetlogorsk.

13  
14 **Belgium:** (N Clumeck), S De Wit, M Delforge, Saint-Pierre Hospital, Brussels; E Florence,  
15  
16  
17 Institute of Tropical Medicine, Antwerp; L Vandekerckhove, University Ziekenhuis Gent, Gent.

18  
19 **Bosnia-Herzegovina:** (V Hadziosmanovic), Klinicki Centar Univerziteta Sarajevo, Sarajevo.

20  
21 **Bulgaria:** (K Kostov), Infectious Diseases Hospital, Sofia.

22  
23 **Croatia:** (J Begovac), University Hospital of Infectious Diseases, Zagreb.

24  
25 **Czech Republic:** (L Machala), D Jilich, Faculty Hospital Bulovka, Prague; D Sedlacek, Charles  
26  
27  
28 University Hospital, Plzen.

29  
30 **Denmark:** (J Nielsen), G Kronborg, T Benfield, M Larsen, Hvidovre Hospital, Copenhagen; J  
31  
32 Gerstoft, T Katzenstein, A-B E Hansen, P Skinhøj, Rigshospitalet, Copenhagen; C Pedersen,  
33  
34  
35 Odense University Hospital, Odense; L Ostergaard, Skejby Hospital, Aarhus, U B Dragsted,  
36  
37  
38 Roskilde Hospital, Roskilde; L N Nielsen, Hillerod Hospital, Hillerod.

39  
40 **Estonia:** (K Zilmer), West-Tallinn Central Hospital, Tallinn; Jelena Smidt, Nakkusosakond  
41  
42  
43 Sisekliinik, Kohtla-Järve.

44  
45 **Finland:** (M Ristola), Helsinki University Central Hospital, Helsinki.

46  
47 **France:** (C Katlama), Hôpital de la Pitié-Salpêtrière, Paris; J-P Viard, Hôtel-Dieu, Paris; P-M  
48  
49  
50 Girard, Hospital Saint-Antoine, Paris; P Vanhems, University Claude Bernard, Lyon; C Pradier,  
51  
52  
53 Hôpital de l'Archet, Nice; F Dabis, D Neau, Unité INSERM, Bordeaux, C Duvivier, Hôpital  
54  
55  
56 Necker-Enfants Malades, Paris.

1  
2  
3 **Germany:** (J Rockstroh), Universitäts Klinik Bonn; R Schmidt, Medizinische Hochschule  
4 Hannover; J van Lunzen, O Degen, University Medical Center Hamburg-Eppendorf, Infectious  
5 Diseases Unit, Hamburg; HJ Stellbrink, IPM Study Center, Hamburg; M Bickel, JW Goethe  
6 University Hospital, Frankfurt; J Bogner, Medizinische Poliklinik, Munich; G. Fätkenheuer,  
7 Universität Köln, Cologne.

8  
9  
10  
11 **Greece:** (J Kosmidis), P Gargalianos, G Xylomenos, J Perdios, Athens General Hospital; H  
12 Sambatakou, Ippokration Genereal Hospital, Athens.

13  
14  
15 **Hungary:** (D Banhegyi), Szent László Hospital, Budapest.

16  
17  
18 **Iceland:** (M Gottfredsson), Landspítali University Hospital, Reykjavik.

19  
20  
21 **Ireland:** (F Mulcahy), St. James's Hospital, Dublin.

22  
23  
24  
25 **Israel:** (I Yust), D Turner, M Burke, Ichilov Hospital, Tel Aviv; S Pollack, G Hassoun, Rambam  
26 Medical Center, Haifa; S Maayan, Hadassah University Hospital, Jerusalem.

27  
28  
29  
30  
31 **Italy:** (A D'Arminio Monforte ), Istituto Di Clinica Malattie Infettive e Tropicale, Milan; R  
32 Esposito, I Mazeu, C Mussini, Università Modena, Modena; C Arici, Ospedale Riuniti,  
33 Bergamo; R Pristera, Ospedale Generale Regionale, Bolzano; F Mazzotta, A Gabbuti, Ospedale  
34 S Maria Annunziata, Firenze; V Vullo, M Lichtner, University di Roma la Sapienza, Rome; A  
35 Chirianni, E Montesarchio, M Gargiulo, Presidio Ospedaliero AD Cotugno, Monaldi Hospital,  
36 Napoli; G Antonucci, A Testa, G D'Offizi, C Vlassi, M Zaccarelli, A Antorini, Istituto Nazionale  
37 Malattie Infettive Lazzaro Spallanzani, Rome; A Lazzarin, A Castagna, N Gianotti, Ospedale  
38 San Raffaele, Milan; M Galli, A Ridolfo, Osp. L. Sacco, Milan.

39  
40  
41  
42 **Latvia:** (B Rozentale), I Zeltina, Infectology Centre of Latvia, Riga.

43  
44  
45  
46 **Lithuania:** (S Chaplinskas), Lithuanian AIDS Centre, Vilnius.

47  
48  
49  
50  
51 **Luxembourg:** (T Staub), R Hemmer, Centre Hospitalier, Luxembourg.

1  
2  
3 **Netherlands:** (P Reiss), Academisch Medisch Centrum bij de Universiteit van Amsterdam,  
4  
5 Amsterdam. Norway: (V Ormaasen), A Maeland, J Bruun, Ullevål Hospital, Oslo.

6  
7  
8 **Poland:** (B Knysz) J Gasiorowski, Medical University, Wroclaw; A Horban, E Bakowska,  
9  
10 Centrum Diagnostyki i Terapii AIDS, Warsaw; A Grzeszczuk, R Flisiak, Medical University,  
11  
12 Bialystok; A Boron-Kaczmarek, M Pynka, M Parczewski, Medical University, Szczecin; M  
13  
14 Beniowski, E Mularska, Osrodek Diagnostyki i Terapii AIDS, Chorzow; H Trocha, Medical  
15  
16 University, Gdansk; E Jablonowska, E Malolepsza, K Wojcik, Wojewodzki Szpital  
17  
18 Specjalistyczny, Lodz.

19  
20  
21  
22 **Portugal:** (F Antunes), M Doroana, L Caldeira, Hospital Santa Maria, Lisbon; K Mansinho,  
23  
24 Hospital de Egas Moniz, Lisbon; F Maltez, Hospital Curry Cabral, Lisbon.

25  
26  
27 **Romania:** (D Duiculescu), Spitalul de Boli Infectioase si Tropicale: Dr. Victor Babes, Bucarest.

28  
29 **Russia:** (A Rakhmanova), Medical Academy Botkin Hospital, St Petersburg; A Rakhmanova, St  
30  
31 Petersburg AIDS Centre, St Peterburg; S Buzunova, Novgorod Centre for AIDS, Novgorod, I  
32  
33 Khromova, Centre for HIV/AIDS & and Infectious Diseases, Kaliningrad; E Kuzovatova,  
34  
35 Nizhny Novgorod Scientific and Research Institute, Nizhny Novogrod.

36  
37  
38 **Serbia:** (D Jevtovic), The Institute for Infectious and Tropical Diseases, Belgrade.

39  
40  
41 Slovakia: (M Mokráš), D Staneková, Dérer Hospital, Bratislava.

42  
43  
44 Slovenia: (J Tomazic), University Clinical Centre Ljubljana, Ljubljana.

45  
46  
47 Spain: (J González-Lahoz), V Soriano, P Labarga, Hospital Carlos III, Madrid; S Moreno, J. M.

48  
49 Rodriguez, Hospital Ramon y Cajal, Madrid; B Clotet, A Jou, R Paredes, C Tural, J Puig, I

50  
51 Bravo, Hospital Germans Trias i Pujol, Badalona; JM Gatell, JM Miró, Hospital Clinic i

52  
53 Provincial, Barcelona; P Domingo, M Gutierrez, G Mateo, MA Sambeat, Hospital Sant Pau,

54  
55  
56 Barcelona; J Medrano, Hospital Universitario de Alava, Vitoria-Gasteiz.



1  
2  
3 **Sweden:** (A Blaxhult), Venhaelsan-Sodersjukhuset, Stockholm; L Flamholc, Malmö University  
4 Hospital, Malmö, A Thalme, A Sonnerborg, Karolinska University Hospital, Stockholm.  
5  
6

7  
8 **Switzerland:** (B Ledergerber), R Weber, University Hospital, Zürich; P Francioli, M Cavassini,  
9 Centre Hospitalier Universitaire Vaudois, Lausanne; B Hirschel, E Boffi, Hospital Cantonal  
10 Universitaire de Geneve, Geneve; H Furrer, Inselspital Bern, Bern; M Battegay, L Elzi,  
11 University Hospital Basel; P Vernazza, Kantonsspital, St. Gallen.  
12  
13

14  
15  
16  
17 **Ukraine:** (E Kravchenko), N Chentsova, Kiev Centre for AIDS, Kiev; V Frolov, G Kutsyna,  
18 Luhansk State Medical University; Luhansk; S Servitskiy, Odessa Region AIDS Center, Odessa;  
19 A Kuznetsova, Kharkov State Medical University, Kharkov; G Kyselyova, Crimean Republican  
20 AIDS centre, Simferopol.  
21  
22

23  
24  
25  
26  
27 **United Kingdom:** (B Gazzard), St. Stephen's Clinic, Chelsea and Westminster Hospital,  
28 London; AM Johnson, D Mercey, Royal Free and University College London Medical School,  
29 London (University College Campus); A Phillips, MA Johnson, A Mocroft, Royal Free and  
30 University College Medical School, London (Royal Free Campus); C Orkin, Royal London  
31 Hospital, London; J Weber, G Scullard, Imperial College School of Medicine at St. Mary's,  
32 London; M Fisher, Royal Sussex County Hospital, Brighton; C Leen, Western General Hospital,  
33 Edinburgh.  
34  
35  
36  
37  
38  
39  
40  
41  
42

43  
44 **Steering Committee:** J Gatell, B Gazzard, A Horban, I Karpov, B Ledergerber, M Losso, A  
45 D'Arminio Monforte, C Pedersen, A Rakhmanova, M Ristola, J Rockstroh (Chair), S De Wit  
46 (Vice-Chair), Additional voting members: J Lundgren, A Phillips, P Reiss.  
47  
48  
49

50  
51 **Coordinating Centre Staff:** O Kirk, A Mocroft, A Cozzi-Lepri, D Grint, A Schultze, L  
52 Shepherd, M Sabin, D Podlekareva, J Kjær, L Peters, J E Nielsen, J Tverland, A H Fischer.  
53  
54  
55  
56  
57  
58  
59  
60

1  
2  
3 **The Groupe d'Epidémiologie Clinique du Sida en Aquitaine (GECSA) --ANRS CO3.**  
4

5 *Coordination:* F. Dabis. *Scientific committee:* F. Bonnet, F. Dabis, M. Dupon, G. Chêne, H.  
6  
7  
8 Fleury, D. Lacoste, D. Malvy, P. Mercié, I. Pellegrin, P. Morlat, D. Neau, JL. Pellegrin, R.  
9  
10 Thiébaud, K. Titier. *Epidemiology and Methodology:* M. Bruyand, G. Chêne, F. Dabis, S.  
11  
12 Lawson-Ayayi, R. Thiébaud, L. Wittkop. *Infectious Diseases and Internal Medicine:* F. Bonnal,  
13  
14 F. Bonnet, N. Bernard, L. Caunègre, C. Cazanave, J. Ceccaldi, D. Chambon, I. Chossat, K.  
15  
16 Courtaud, FA. Dauchy, S. De Witte, M. Dupon, A. Dupont, P. Duffau, H. Dutronc, S. Farbos, V.  
17  
18 Gaboriau, MC. Gemain, Y. Gerard, C. Greib, M. Hessamfar, D. Lacoste, P. Lataste, S. Lafarie-  
19  
20 Castet, E. Lazaro, M. Longy-Boursier, D. Malvy, JP. Meraud, P. Mercié, E. Monlun, P. Morlat,  
21  
22 D. Neau, A. Ochoa, JL. Pellegrin, T. Pistone, JM. Ragnaud, MC. Receveur, J. Roger-Schmeltz,  
23  
24 S. Tchamgoué, P. Thibaut, MA. Vandenhende, JF. Viillard. *Immunology:* JF. Moreau, I.  
25  
26 Pellegrin. *Virology:* H. Fleury, ME. Lafon, B. Masquelier, P. Trimoulet. *Pharmacology:* D.  
27  
28 Breilh, K. Titier. *Drug monitoring:* F. Haramburu, G. Miremont-Salamé. *Data collection and*  
29  
30 *processing:* MJ. Blaizeau, M. Decoin, J. Delaune, S. Delveaux, C. D'Ivernois, C. Hanappier, O.  
31  
32 Leleux, B. Uwamaliya-Nziyumvira, X. Sicard. *Computing and Statistical analysis:* S. Geffard, J.  
33  
34 Leray, G. Palmer, D. Touchard. *Special thanks to Madeleine Decoin for her assistance in*  
35  
36  
37  
38  
39  
40  
41  
42  
43  
44  
45  
46  
47  
48  
49  
50  
51  
52  
53  
54  
55  
56  
57  
58  
59  
60  
obtaining subtype data.

**STROBE Statement: The effects of HIV-1 subtype and ethnicity on CD4 decline in antiretroviral naïve patients: a Canadian-European collaborative cohort study**

|                              | Item No | Recommendation                                                                                                                                                                                                                              |
|------------------------------|---------|---------------------------------------------------------------------------------------------------------------------------------------------------------------------------------------------------------------------------------------------|
| <b>Title and abstract</b>    | 1       | (a) Indicate the study's design with a commonly used term in the title or the abstract<br><a href="#">In title</a>                                                                                                                          |
|                              |         | (b) Provide in the abstract an informative and balanced summary of what was done and what was found<br><a href="#">Done</a>                                                                                                                 |
| <b>Introduction</b>          |         |                                                                                                                                                                                                                                             |
| Background/rationale         | 2       | Explain the scientific background and rationale for the investigation being reported<br><a href="#">Introduction - second paragraph</a>                                                                                                     |
| Objectives                   | 3       | State specific objectives, including any prespecified hypotheses<br><a href="#">Introduction - final paragraph</a>                                                                                                                          |
| <b>Methods</b>               |         |                                                                                                                                                                                                                                             |
| Study design                 | 4       | Present key elements of study design early in the paper<br><a href="#">Methods - first paragraph; Table 1</a>                                                                                                                               |
| Setting                      | 5       | Describe the setting, locations, and relevant dates, including periods of recruitment, exposure, follow-up, and data collection<br><a href="#">Methods - second and third paragraphs</a>                                                    |
| Participants                 | 6       | <i>Cohort study</i> —Give the eligibility criteria, and the sources and methods of selection of participants. Describe methods of follow-up<br><a href="#">Table 1 - references given for each contributing cohort</a>                      |
| Variables                    | 7       | Clearly define all outcomes, exposures, predictors, potential confounders, and effect modifiers.<br><a href="#">Methods - first paragraph; Statistical Analysis - first paragraph</a>                                                       |
| Data sources/<br>measurement | 8*      | For each variable of interest, give sources of data and details of methods of assessment (measurement). Describe comparability of assessment methods if there is more than one group<br><a href="#">Methods - second paragraph; Table 1</a> |
| Bias                         | 9       | Describe any efforts to address potential sources of bias<br><a href="#">Methods - third paragraph; Statistical Analysis - second paragraph</a>                                                                                             |
| Study size                   | 10      | Explain how the study size was arrived at<br><a href="#">Results - first paragraph</a>                                                                                                                                                      |
| Quantitative variables       | 11      | Explain how quantitative variables were handled in the analyses. If applicable, describe which groupings were chosen and why<br><a href="#">Not relevant</a>                                                                                |
| Statistical methods          | 12      | (a) Describe all statistical methods, including those used to control for confounding<br><a href="#">Statistical Analysis - first and second paragraphs</a>                                                                                 |
|                              |         | (b) Describe any methods used to examine subgroups and interactions<br><a href="#">Statistical Analysis - second paragraph</a>                                                                                                              |
|                              |         | (c) Explain how missing data were addressed<br><a href="#">Results - third paragraph; Table 3</a>                                                                                                                                           |
|                              |         | (d) <i>Cohort study</i> —If applicable, explain how loss to follow-up was addressed<br><a href="#">Not applicable</a>                                                                                                                       |

(e) Describe any sensitivity analyses

[Statistical analysis - second paragraph](#)

## Results

Participants 13\* (a) Report numbers of individuals at each stage of study—eg numbers potentially eligible, examined for eligibility, confirmed eligible, included in the study, completing follow-up, and analysed

[Results - first and third paragraphs](#)

(b) Give reasons for non-participation at each stage

[Results - first and third paragraphs](#)

(c) Consider use of a flow diagram

Descriptive data 14\* (a) Give characteristics of study participants (eg demographic, clinical, social) and information on exposures and potential confounders

[Table 2](#)

(b) Indicate number of participants with missing data for each variable of interest

[Tables 2 and 3](#)

(c) *Cohort study*—Summarise follow-up time (eg, average and total amount)

[Results - first paragraph; Table 2](#)

Outcome data 15\* *Cohort study*—Report numbers of outcome events or summary measures over time

[Table 7](#)

Main results 16 (a) Give unadjusted estimates and, if applicable, confounder-adjusted estimates and their precision (eg, 95% confidence interval). Make clear which confounders were adjusted for and why they were included

[Statistical Analysis - first paragraph; Table 4](#)

(b) Report category boundaries when continuous variables were categorized

[Not applicable](#)

(c) If relevant, consider translating estimates of relative risk into absolute risk for a meaningful time period

[Not relevant - however untransformed results presented in Table 5 for ease of interpretation](#)

Other analyses 17 Report other analyses done—eg analyses of subgroups and interactions, and sensitivity analyses

[Results - paragraphs four, five and six](#)

## Discussion

Key results 18 Summarise key results with reference to study objectives

[Discussion - first paragraph](#)

Limitations 19 Discuss limitations of the study, taking into account sources of potential bias or imprecision. Discuss both direction and magnitude of any potential bias

[Limitations](#)

Interpretation 20 Give a cautious overall interpretation of results considering objectives, limitations, multiplicity of analyses, results from similar studies, and other relevant evidence

[Conclusions](#)

Generalisability 21 Discuss the generalisability (external validity) of the study results

[Limitations](#)

## Other information

Funding 22 Give the source of funding and the role of the funders for the present study and, if applicable, for the original study on which the present article is based

[Financial Disclosure statement](#)
